# Supplementary material for: Soil Communities: Who Responds and How Quickly to a Change in Agricultural System?
Source: MDPI journal article supplement (doi:10.3390/su14010383), 2021-12-30
Supplement: s1 [file s1]

**Table S2:** Spearman rank correlations (R values) of single chemical variables with matrices of bacterial, fungal and microarthropod community composition, and soil processes based on Mantel tests. Significance levels: \*\*\*:  $p < 0.001$ ; \*\*:  $p < 0.01$ ; \*:  $p \leq 0.05$ .

| T0. T1. T2        |                   | Integrated |          |       |         |        | Organic |          |       |       |        |
|-------------------|-------------------|------------|----------|-------|---------|--------|---------|----------|-------|-------|--------|
|                   |                   | Fu         | Ba       | μAr   | μArEu   | Diatom | Fu      | Ba       | μAr   | μArEu | Diatom |
| Inter-row         |                   |            |          |       |         |        |         |          |       |       |        |
| Texture Elements  | Sand              | 0.08       | 0.14 *   | 0.04  | -0.01   | -0.01  | 0.09    | 0.09     | 0.08  | 0.09  | -0.06  |
|                   | Silt              | 0.07       | 0.24 **  | 0.06  | -0.1    | 0.04   | 0.09    | 0.23 **  | 0.04  | 0.06  | 0.03   |
|                   | Clay              | 0.23 *     | 0.08     | -0.06 | 0.11    | 0.11   | 0.18    | 0.29 **  | -0.05 | -0.03 | 0.07   |
| Chemical Elements | pH                | 0.4 ***    | 0.05     | 0.04  | 0.01    | 0      | 0.08    | 0.07     | -0.03 | -0.14 | -0.03  |
|                   | CSC               | 0.06       | 0.23 **  | 0.01  | -0.02   | 0.38*  | 0.06    | 0.38 *** | 0.07  | -0.08 | 0.11   |
|                   | Total carbonates  | 0.1        | 0.33 *** | -0.02 | -0.02   | 0.31*  | 0.09    | 0.63 *** | -0.02 | -0.06 | 0.07   |
|                   | Active carbonates | 0.08       | -0.08    | 0.05  | 0.22    | 0.04   | 0.22    | -0.06    | 0.11  | -0.03 | -0.06  |
|                   | Exchangeable Ca   | 0.12       | 0.15 *   | 0.04  | 0.08    | 0.02   | 0.06    | 0.44 *** | 0.06  | -0.11 | 0.07   |
|                   | SOM               | 0.14 *     | 0.3 ***  | 0.01  | 0.02    | 0.28*  | 0.15    | 0.42 *** | 0.06  | -0.07 | 0.22*  |
|                   | Total N           | 0.11       | 0.27 *** | -0.03 | -0.03   | 0.37*  | 0.15    | 0.37 *** | 0.03  | -0.1  | 0.27*  |
|                   | Assimilable P     | 0.03       | 0.13     | -0.04 | -0.22   | -0.05  | 0.15    | 0.05     | -0.01 | -0.05 | 0      |
|                   | Exchangeable K    | 0.05       | 0.11     | 0.01  | -0.13   | 0.22   | 0.18    | 0.15 *   | 0.01  | -0.06 | 0.13   |
|                   | Exchangeable Mg   | 0.1        | 0.06     | -0.01 | 0.28 ** | 0.32** | 0.05    | 0.23 *   | 0.03  | -0.07 | 0.13   |
| Micro Elements    | Available Cu      | -0.01      | 0.12     | -0.02 | -0.25   | 0.06   | 0.03    | 0.33 *** | 0.1   | -0.08 | 0.2    |
|                   | Available Pb      | 0.11       | 0.07     | -0.06 | 0.18    | 0.31*  | 0.03    | 0.13 *   | -0.09 | 0.02  | 0.24*  |
|                   | Available Zn      | 0.11       | 0.21 **  | -0.01 | 0.03    | 0.33** | 0.06    | 0.36 *** | 0.06  | -0.12 | 0.1    |
|                   | Available Mn      | -0.03      | 0.07     | -0.15 | -0.02   | -0.07  | -0.05   | 0.09     | 0.08  | 0.03  | 0.14   |
|                   | Available Fe      | 0.04       | 0.02     | -0.01 | -0.22   | -0.04  | 0.09    | 0.29 *** | 0.06  | -0.01 | 0.05   |
|                   | Soluble B         | -0.01      | 0.05     | 0.01  | -0.03   | 0.28*  | 0.03    | 0.18 **  | 0.11  | -0.04 | -0.01  |
|                   | Fu                | 1 ***      | 0.33 *** | 0.01  | -0.03   | 0.04   | 1 ***   | 0.09     | -0.16 | 0.08  | 0.13   |
|                   | Ba                | 0.33 **    | 1 ***    | 0.02  | -0.05   | 0.13   | 0.09    | 1 ***    | -0.01 | 0.03  | 0.3*   |
|                   | μAr               | 0.01       | 0.02     | 1 *** | 0.02    | -0.04  | -0.16   | -0.01    | 1 *** | 0.05  | -0.02  |

|                  |                   |         |          |         |        |       |          |          |         |          |      |
|------------------|-------------------|---------|----------|---------|--------|-------|----------|----------|---------|----------|------|
|                  | μAr–Eu            | −0.03   | −0.05    | 0.02    | 1 ***  | −0.06 | 0.08     | 0.03     | 0.05    | 1 ***    | 0.02 |
|                  | Diatom            | 0.04    | 0.13     | −0.04   | −0.06  | 1**   | 0.13     | 0.3**    | −0.02   | 0.02     | 1**  |
| Row              |                   |         |          |         |        |       |          |          |         |          |      |
| Texture Elements | Sand              | −0.01   | 0.04     | 0.07    | 0.04   | -     | 0.1      | 0.31 **  | 0.08    | 0.18     |      |
|                  | Silt              | 0.03    | 0.05     | 0.07    | 0.06   |       | 0.11     | 0.39 *** | 0.03    | 0.16     |      |
|                  | Clay              | 0.08    | 0.2 *    | 0.01    | 0.08   |       | 0.04     | 0.31 *** | −0.03   | −0.07    |      |
| Edaphic Elements | pH                | 0.05    | 0.21 **  | 0       | 0.03   |       | 0.16     | −0.07    | 0       | −0.05    |      |
|                  | CSC               | 0.04    | 0.26 **  | 0.01    | −0.02  |       | 0.06     | 0.21 *   | −0.09   | −0.14    |      |
|                  | Total carbonates  | 0.06    | 0.35 *** | 0.06    | −0.03  |       | 0.12 *   | 0.43 *** | 0.02    | −0.01    |      |
|                  | Active carbonates | −0.1    | 0.02     | 0.02    | 0.03   |       | 0.01     | −0.16    | 0.17    | 0.22     |      |
|                  | Exchangeable Ca   | 0.03    | 0.07     | 0.1     | 0.09   |       | 0.24 *   | 0.3 ***  | −0.12   | −0.08    |      |
|                  | SOM               | 0.01    | 0.26 *** | −0.02   | −0.05  |       | 0.07     | 0.32 **  | −0.11   | −0.16    |      |
|                  | Total N           | −0.01   | 0.28 *** | 0.04    | −0.05  |       | 0.04     | 0.19 *   | −0.11   | −0.18    |      |
|                  | Assimilable P     | −0.03   | 0.1 *    | 0.19 ** | 0.1    |       | −0.03    | −0.01    | −0.02   | −0.04    |      |
|                  | Exchangeable K    | 0.31 ** | 0.1      | 0.15    | 0.19 * |       | 0.06     | 0.08     | −0.07   | −0.13    |      |
|                  | Exchangeable Mg   | 0.04    | 0.21 **  | 0.05    | 0.06   |       | 0.03     | 0.11     | −0.06   | −0.14    |      |
| Micro Elements   | Available Cu      | 0.16    | −0.02    | −0.02   | 0.03   |       | 0.06     | 0.12     | −0.04   | −0.11    |      |
|                  | Available Pb      | 0.02    | 0.19 **  | −0.05   | −0.02  |       | 0.36 *** | 0.08     | 0.12    | 0.06     |      |
|                  | Available Zn      | 0.02    | 0.33 *** | 0.05    | −0.05  |       | 0.01     | 0.21 *   | −0.13   | −0.21    |      |
|                  | Available Mn      | 0.16    | −0.07    | −0.1    | 0.01   |       | 0        | −0.06    | 0.04    | 0.12     |      |
|                  | Available Fe      | 0.01    | −0.11    | 0.08    | −0.02  |       | 0.14     | 0.11     | 0.1     | 0.2 *    |      |
|                  | Soluble B         | −0.15   | 0.22 **  | 0.2 *   | −0.04  |       | −0.06    | 0.19 *   | −0.06   | −0.09    |      |
|                  | Fu                | 1 ***   | 0.22 **  | −0.02   | 0.22   |       | 1 ***    | 0.24 **  | 0       | 0.09     |      |
|                  | Ba                | 0.22 ** | 1 ***    | 0.08    | 0.04   |       | 0.24 **  | 1 ***    | 0.14    | 0.12     |      |
|                  | μAr               | −0.02   | 0.08     | 1 ***   | 0.25 * |       | 0        | 0.14     | 1 ***   | 0.41 *** |      |
|                  | μArEu             | 0.22 *  | 0.04     | 0.25 *  | 1 ***  |       | 0.09     | 0.12     | 0.41 ** | 1 ***    |      |
